# Supplementary material for: Cytocompatible, disintegrable, low-voltage operation n-type organic thin film transistors
Source: Royal Society of Chemistry journal article supplement (doi:10.1039/d4ma01148a), 2024-12-23
Supplement: d4ma01148a1.pdf [file d4ma01148a1.pdf]

## Supporting Information

### Cytocompatible, Disintegrable, Low-Voltage Operation n-type Organic Thin Film

#### Transistor

Mohsin Ali<sup>1</sup>, Bahar Ronnasi<sup>1</sup>, May Ourabi,<sup>1</sup> Joon Hyung Park<sup>2</sup>, Jean-Philippe St-Pierre/<sup>1</sup> Chang-Hyun Kim<sup>3</sup> and Benoît H. Lessard<sup>1,3\*</sup>

1. University of Ottawa, Department of Chemical and Biological Engineering, 161 Louis Pasteur, Ottawa, ON, Canada
2. Gachon University, School of Electronic Engineering, Seongnam 13120, Republic of Korea
3. University of Ottawa, School of Electrical Engineering and Computer Science, 800 King Edward Ave. Ottawa, ON, Canada

\*Corresponding author: benoit.lessard@uottawa.ca

**Table S1.** Key materials parameters used as input to the numerical simulation.

| Layer         | Parameter                        | OTFT with SiO <sub>2</sub> /OTS                                  | OTFT with PVA/UV-PCL                                             |
|---------------|----------------------------------|------------------------------------------------------------------|------------------------------------------------------------------|
| Gate          | Work function                    | 4.0 eV                                                           | 4.0 eV                                                           |
| Source/drain  | Work function                    | 4.35 eV                                                          | 4.35 eV                                                          |
| Dielectric    | Capacitance                      | 15 nF/cm <sup>2</sup>                                            | 27 nF/cm <sup>2</sup>                                            |
|               | Interface charge                 | -6 × 10 <sup>11</sup> cm <sup>-2</sup>                           | None                                                             |
| Semiconductor | Ionization energy (HOMO)         | 5.65 eV                                                          | 5.65 eV                                                          |
|               | Electron affinity (LUMO)         | 3.85 eV                                                          | 3.85 eV                                                          |
|               | HOMO effective density of states | 10 <sup>20</sup> cm <sup>-3</sup>                                | 10 <sup>20</sup> cm <sup>-3</sup>                                |
|               | LUMO effective density of states | 10 <sup>20</sup> cm <sup>-3</sup>                                | 10 <sup>20</sup> cm <sup>-3</sup>                                |
|               | Electron mobility                | 0.3 cm <sup>2</sup> V <sup>-1</sup> s <sup>-1</sup>              | 0.3 cm <sup>2</sup> V <sup>-1</sup> s <sup>-1</sup>              |
|               | Hole mobility                    | 10 <sup>-5</sup> cm <sup>2</sup> V <sup>-1</sup> s <sup>-1</sup> | 10 <sup>-5</sup> cm <sup>2</sup> V <sup>-1</sup> s <sup>-1</sup> |
|               | Total trap density               | 10 <sup>18</sup> cm <sup>-3</sup>                                | None                                                             |
|               | Trap characteristic temperature  | 1200 K                                                           | None                                                             |
